# Supplementary material
Source: PubMed Central journal article supplement (PMC2228331)

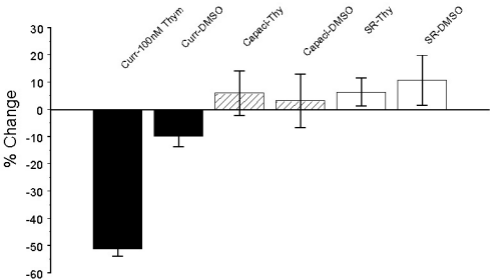

Supplement: NIHMS30954-supplement-01.pdf [file NIHMS30954-supplement-01.pdf]

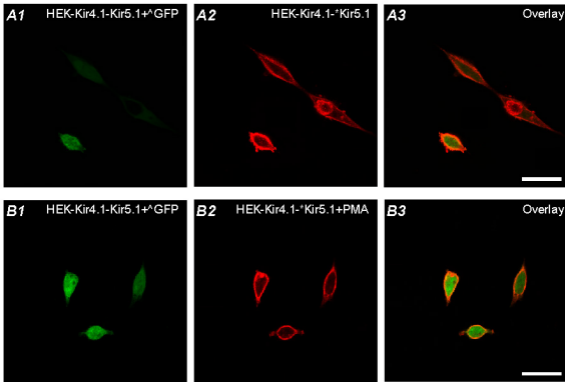

Supplement: NIHMS30954-supplement-02.pdf [file NIHMS30954-supplement-02.pdf]

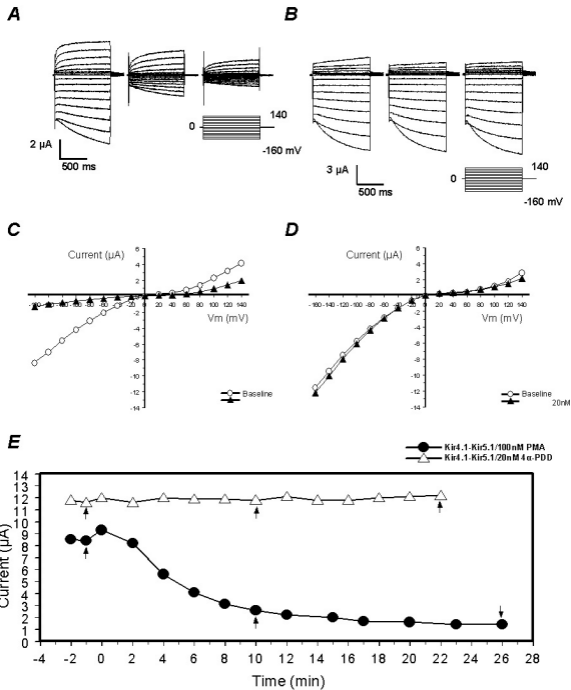

Supplement: NIHMS30954-supplement-03.pdf [file NIHMS30954-supplement-03.pdf]

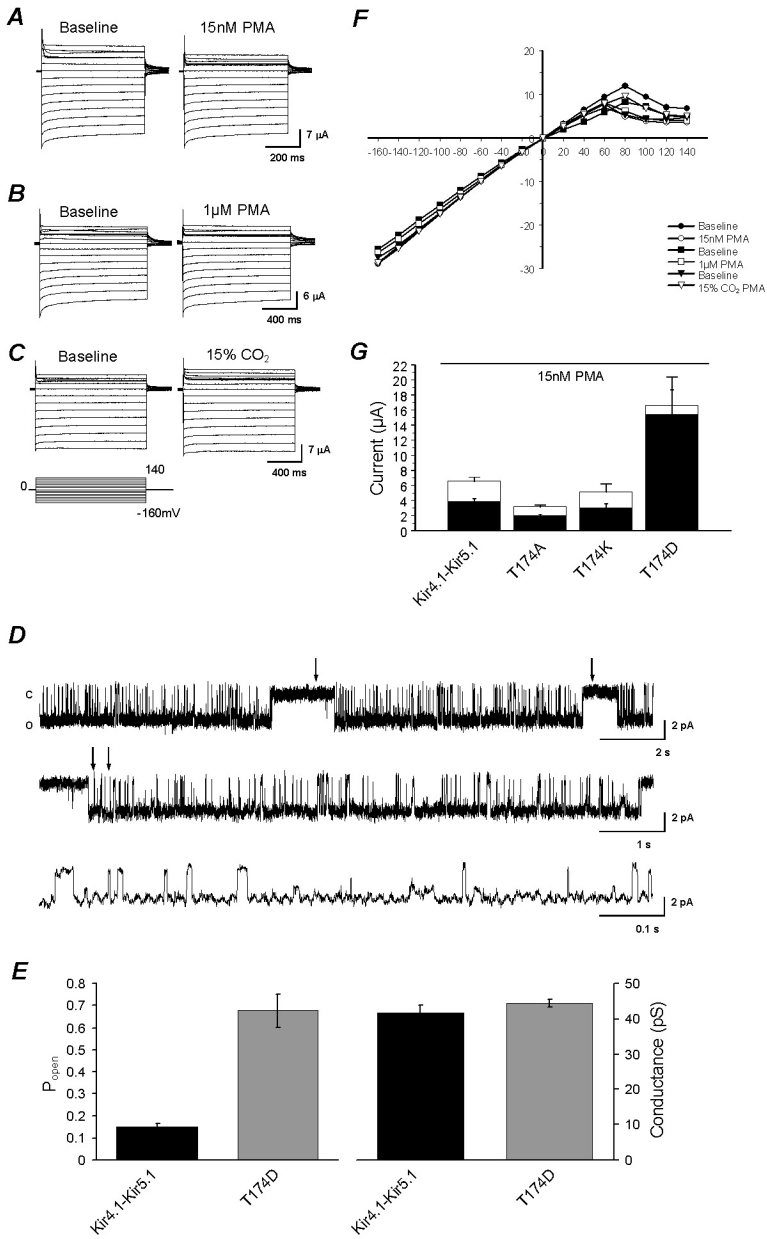

Supplement: NIHMS30954-supplement-04.pdf [file NIHMS30954-supplement-04.pdf]
